# Supplementary material for: Long-Term Antibody Response and Vaccination Efficacy in Patients with COVID-19: A Single Center One-Year Prospective Study from the Czech Republic
Source: MDPI journal article supplement (doi:10.3390/v14030526), 2022-03-04
Supplement: s1 [file s1]

**Supplementary Table S1.** Summary of the analysis of the individual antibody classes in patient cohorts over time. The statistical evaluation compares the data from Cohort A and Cohort B. The normality was tested using the Shapiro–Wilk test. Normally distributed data were analyzed using non-parametric t-test. Non-normally distributed data were analyzed by Kruskal–Wallis test with post hoc Mann–Whitney test. The differences were considered significant when  $p \leq 0.05$ .

|           |             | IgA      |          |         | IgM      |          |         | IgG      |          |         |
|-----------|-------------|----------|----------|---------|----------|----------|---------|----------|----------|---------|
|           |             | Cohort A | Cohort B | p value | Cohort A | Cohort B | p value | Cohort A | Cohort B | p value |
| Admission | Positive*   | 52.17    | NA       | NA      | 37.2     | NA       | NA      | 28,99    | NA       | NA      |
|           | Borderline* | 7.24     | NA       |         | 5.31     | NA       |         | 6.76     | NA       |         |
|           | Negative*   | 40.59    | NA       |         | 57.49    | NA       |         | 64.25    | NA       |         |
|           | Pos avg     | 6.52     | NA       |         | 4.38     | NA       |         | 4.93     | NA       |         |
|           | Pos med     | 5.59     | NA       |         | 3.41     | NA       |         | 4.02     | NA       |         |
| Week 2    | Positive*   | 98.75    | NA       | NA      | 77.75    | NA       | NA      | 95.00    | 59.12    | <0.0001 |
|           | Borderline* | 0.00     | NA       |         | 5.00     | NA       |         | 2.50     | 13.14    |         |
|           | Negative*   | 1.25     | NA       |         | 17.25    | NA       |         | 2.50     | 27.74    |         |
|           | Pos avg     | 9.98     | NA       |         | 5.07     | NA       |         | 7.34     | 3.09     |         |
|           | Pos med     | 10.95    | NA       |         | 4.11     | NA       |         | 7.55     | 2.69     |         |
| Month 3   | Positive*   | 90.52    | 69.16    | <0.0001 | 14.66    | 2.80     | 0.0028  | 94.83    | 86.84    | <0.0001 |
|           | Borderline* | 5.17     | 11.21    |         | 6.90     | 3.74     |         | 0.86     | 2.63     |         |
|           | Negative*   | 4.31     | 19.63    |         | 78.44    | 93.46    |         | 4.31     | 10.53    |         |
|           | Pos avg     | 6.74     | 2.70     |         | 2.10     | 2.84     |         | 6.75     | 3.96     |         |
|           | Pos med     | 5.68     | 2.00     |         | 1.85     | 2.92     |         | 7.07     | 6.67     |         |
| Month 6   | Positive*   | 97.62    | 86.30    | <0.0001 | 7.14     | 0.00     | 0.0033  | 98.81    | 82.19    | <0.0001 |
|           | Borderline* | 2.38     | 4.11     |         | 5.95     | 5.48     |         | 0.00     | 4.11     |         |
|           | Negative*   | 0.00     | 9.59     |         | 86.91    | 94.52    |         | 1.19     | 13.70    |         |
|           | Pos avg     | 9.31     | 5.89     |         | 1.97     | 0.00     |         | 8.27     | 6.42     |         |
|           | Pos med     | 10.21    | 5.54     |         | 2.11     | 0.00     |         | 9.41     | 7.99     |         |
| Month 9   | Positive*   | 92.31    | 78.26    | <0.0001 | 5.13     | 2.42     | 0.2152  | 97.44    | 76.61    | <0.0001 |
|           | Borderline* | 7.69     | 5.65     |         | 2.56     | 3.23     |         | 0.00     | 9.68     |         |
|           | Negative*   | 0.00     | 16.09    |         | 92.31    | 94.35    |         | 2.56     | 13.71    |         |
|           | Pos avg     | 8.80     | 5.68     |         | 1.55     | 1.91     |         | 7.88     | 5.26     |         |
|           | Pos med     | 9.96     | 4.17     |         | 1.55     | 2.10     |         | 9.94     | 4.41     |         |
| Month 12  | Positive*   | 96.70    | 88.44    | 0.095   | 5.49     | 0.70     | 0.1098  | 96.70    | 88.44    | <0.0001 |
|           | Borderline* | 1.10     | 4.76     |         | 0.00     | 0.70     |         | 1.10     | 3.08     |         |
|           | Negative*   | 2.20     | 6.80     |         | 94.51    | 98.60    |         | 2.20     | 8.48     |         |
|           | Pos avg     | 8.35     | 7.94     |         | 1.68     | 2.73     |         | 8.52     | 7.01     |         |
|           | Pos med     | 9.88     | 7.92     |         | 1.13     | 2.73     |         | 9.30     | 8.40     |         |

Notes: \* percentage of patients; Cohort A - hospitalized patients; Cohort B - non hospitalized patients; NA - not applicable; Pos avg – average of positive results; Pos med – median value of positive results

**Supplementary Table S2a.** Summary of the analysis of the individual antibody classes in patient cohorts affected by the vaccination or re-infection. The statistical evaluation compares the data from non-vaccinated patients to samples from vaccinated population in both Cohort A and Cohort B. The normality was tested using the Shapiro–Wilk test. Normally distributed data were analyzed using non-parametric t-test. Non-normally distributed data were analyzed by Kruskal–Wallis test with post hoc Mann–Whitney test. The differences were considered significant when  $p \leq 0.05$ .

|          |             | NON - VACCINATED/NON-REINFECTED |       |        |       |        |       | VACCINATED |         |       |         |       |         |        |         |        |         |        |         |
|----------|-------------|---------------------------------|-------|--------|-------|--------|-------|------------|---------|-------|---------|-------|---------|--------|---------|--------|---------|--------|---------|
|          |             | IgA                             |       | IgM    |       | IgG    |       | IgA        |         |       |         | IgM   |         |        |         | IgG    |         |        |         |
|          |             | Coh A                           | Coh B | Coh A  | Coh B | Coh A  | Coh B | Coh A      | p value | Coh B | p value | Coh A | p value | Coh B  | p value | Coh A  | p value | Coh B  | p value |
| Month 6  | positive*   | 91.67                           | 76.32 | 12.50  | 0.00  | 95.83  | 71.05 | 100.00     | <0.0001 | 97.06 | <0.0001 | 5.17  |         | 0.00   |         | 100.00 | <0.0001 | 97.06  | <0.0001 |
|          | borderline* | 8.33                            | 7.89  | 4.17   | 2.63  | 0.00   | 5.26  | 0.00       |         | 0.00  |         | 6.90  |         | 8.82   |         | 0.00   |         | 0.00   |         |
|          | negative*   | 0.00                            | 15.79 | 83.33  | 97.37 | 4.17   | 23.69 | 0.00       |         | 2.94  |         | 87.93 |         | 91.18  |         | 0.00   |         | 2.94   |         |
|          | Pos avg     | 5.14                            | 3.65  | 2.07   | 0.00  | 5.29   | 3.79  | 10.87      |         | 7.83  |         | 1.86  |         | 0.00   |         | 9.35   |         | 8.44   |         |
|          | Pos med     | 4.45                            | 1.73  | 2.09   | 0.00  | 5.49   | 2.41  | 11.32      |         | 7.41  |         | 2.13  |         | 0.00   |         | 9.66   |         | 8.98   |         |
| Month 9  | positive*   | 87.5                            | 67.86 | 0.00   | 3.57  | 100.00 | 65.48 | 95.65      | 0.0131  | 96.97 | <0.0001 | 8.70  |         | 0.00   | 0.0012  | 95.65  | 0.0026  | 96.97  | <0.0001 |
|          | borderline* | 12.5                            | 8.33  | 0.00   | 3.57  | 0.00   | 14.29 | 0.00       |         | 0.00  |         | 4.35  |         | 0.00   |         | 0.00   |         | 0.00   |         |
|          | negative*   | 0.00                            | 23.81 | 100.00 | 92.86 | 0.00   | 20.23 | 4.35       |         | 3.03  |         | 86.95 |         | 100.00 |         | 4.35   |         | 3.03   |         |
|          | Pos avg     | 7.07                            | 3.70  | 0.00   | 1.91  | 5.45   | 3.21  | 9.90       |         | 8.94  |         | 1.54  |         | 0.00   |         | 9.65   |         | 9.02   |         |
|          | Pos med     | 6.10                            | 2.98  | 0.00   | 2.10  | 4.03   | 2.86  | 12.40      |         | 8.89  |         | 1.54  |         | 0.00   |         | 10.41  |         | 9.36   |         |
| Month 12 | positive*   | 87.5                            | 74.00 | 0.00   | 2.00  | 87.5   | 66.00 | 100.00     | <0.0001 | 96.74 | <0.0001 | 5.41  |         | 0.00   |         | 100.00 | 0.0002  | 100.00 | <0.0001 |
|          | borderline* | 6.25                            | 12.00 | 6.25   | 0.00  | 6.25   | 8.00  | 0.00       |         | 0.00  |         | 0.00  |         | 1.10   |         | 0.00   |         | 0.00   |         |
|          | negative*   | 6.25                            | 14.00 | 93.75  | 98.00 | 6.25   | 26.00 | 0.00       |         | 3.26  |         | 94.59 |         | 98.90  |         | 0.00   |         | 0.00   |         |
|          | Pos avg     | 4.94                            | 4.13  | 0.00   | 2.73  | 5.38   | 3.15  | 8.98       |         | 9.30  |         | 1.84  |         | 0.00   |         | 9.09   |         | 8.45   |         |
|          | Pos med     | 3.39                            | 3.37  | 0.00   | 2.73  | 3.71   | 2.38  | 9.99       |         | 9.92  |         | 1.68  |         | 0.00   |         | 9.44   |         | 9.16   |         |

Notes: \* percentage of patients; Coh A – Cohort A (hospitalized patients); Coh B – Cohort B (non hospitalized patients); NA - not applicable; Pos avg – average of positive results; Pos med – median value of positive results

**Supplementary Table S2b.** Summary of the analysis of the individual antibody classes in patient cohorts affected by the vaccination. The statistical evaluation compares the data from patients vaccinated  $\leq 4$  months with data of those vaccinated  $\geq 5$  months in both Cohort A and Cohort B. The normality was tested using the Shapiro–Wilk test. Normally distributed data were analyzed using non-parametric t-test. Non-normally distributed data were analyzed by Kruskal–Wallis test with post hoc Mann–Whitney test. The differences were considered significant when  $p \leq 0.05$ .

|          |             | VACCINATED <=4M |        |       |        |        |        | VACCINATED >=5 M |                |       |                |        |                |        |                |       |                |        |                |
|----------|-------------|-----------------|--------|-------|--------|--------|--------|------------------|----------------|-------|----------------|--------|----------------|--------|----------------|-------|----------------|--------|----------------|
|          |             | IgA             |        | IgM   |        | IgG    |        | IgA              |                |       |                | IgM    |                |        |                | IgG   |                |        |                |
|          |             | Coh A           | Coh B  | Coh A | Coh B  | Coh A  | Coh B  | Coh A            | <i>p value</i> | Coh B | <i>p value</i> | Coh A  | <i>p value</i> | Coh B  | <i>p value</i> | Coh A | <i>p value</i> | Coh B  | <i>p value</i> |
| Month 9  | positive*   | 100.00          | 100.00 | 11.11 | 0.00   | 100.00 | 100.00 | 80.00            | 0.2032         | 90,91 | 0.0033         | 0.00   | 0.3530         | 0.00   | 0.4446         | 80.00 | 0.0089         | 90.91  | 0.0042         |
|          | borderline* | 0.00            | 0.00   | 5.56  | 0.00   | 0.00   | 0.00   | 20.00            |                | 0.00  |                | 0.00   |                | 0.00   |                | 0.00  |                |        |                |
|          | negative*   | 0.00            | 0.00   | 83.33 | 100.00 | 0.00   | 0.00   | 0.00             |                | 9,09  |                | 100.00 |                | 100.00 |                | 20.00 |                | 9.09   |                |
|          | Pos avg     | 10.10           | 10.21  | 1.54  | 0.00   | 10.01  | 9.44   | 7.66             |                | 6.15  |                | 0.00   |                | 0.00   |                | 8.00  |                | 8.11   |                |
|          | Pos med     | 12.73           | 11.84  | 1.54  | 0.00   | 10.58  | 9.59   | 6.72             |                | 6.02  |                | 0.00   |                | 0.00   |                | 9.83  |                | 8.58   |                |
| Month 12 | positive*   | 100.00          | 100.00 | 7.41  | 0.00   | 100.00 | 100.00 | 97.87            | 0.0009         | 93.18 | < 0.0001       | 4.44   | 0.9163         | 0.00   | 0.2321         | 97.87 | 0.0399         | 100.00 | 0.0061         |
|          | borderline* | 0.00            | 0.00   | 0.00  | 2.08   | 0.00   | 0.00   | 0.00             |                | 0.00  |                | 0.00   |                | 0.00   |                | 0.00  |                |        |                |
|          | negative*   | 0.00            | 0.00   | 92.59 | 97.92  | 0.00   | 0.00   | 2.23             |                | 6.82  |                | 95.56  |                | 100.00 |                | 2.23  |                | 0.00   |                |
|          | Pos avg     | 9.59            | 10.96  | 2.00  | 0.00   | 9.23   | 9.03   | 8.62             |                | 7.36  |                | 1.68   |                | 0.00   |                | 9.01  |                | 7.81   |                |
|          | Pos med     | 11.46           | 11.58  | 2.00  | 0.00   | 7.72   | 9.43   | 9.92             |                | 7.23  |                | 1.68   |                | 0.00   |                | 9.20  |                | 8.40   |                |

Notes: \* percentage of patients; Coh A – Cohort A (hospitalized patients); Coh B – Cohort B (non hospitalized patients); Pos avg – average of positive results; Pos med – median value of positive results

**Supplementary Table S2c.** Summary of the analysis of the individual antibody classes in patient cohorts affected by re-infection. The table shows the data from non-vaccinated patients to samples from non-vaccinated patients with serologically marks of re-infection in both Cohort A and Cohort. The statistical analysis was not performed for low sample numbers.

|          |             | NON - VACCINATED/NON-REINFECTED |       |        |       |        |       | NON-VACCINATE/REINFECTED |        |        |        |        |        |
|----------|-------------|---------------------------------|-------|--------|-------|--------|-------|--------------------------|--------|--------|--------|--------|--------|
|          |             | IgA                             |       | IgM    |       | IgG    |       | IgA                      |        | IgM    |        | IgG    |        |
|          |             | Coh A                           | Coh B | Coh A  | Coh B | Coh A  | Coh B | Coh A                    | Coh B  | Coh A  | Coh B  | Coh A  | Coh B  |
| Month 6  | positive*   | 91.67                           | 76.32 | 12.50  | 0.00  | 95.83  | 71.05 | 100.00                   | 100.00 | 0.00   | 0.00   | 100.00 | 100.00 |
|          | borderline* | 8.33                            | 7.89  | 4.17   | 2.63  | 0.00   | 5.26  | 0.00                     | 0.00   | 0.00   | 0.00   | 0.00   | 0.00   |
|          | negative*   | 0.00                            | 15.79 | 83.33  | 97.37 | 4.17   | 23.69 | 0.00                     | 0.00   | 100.00 | 100.00 | 0.00   | 0.00   |
|          | Pos avg     | 5.14                            | 3.65  | 2.07   | 0.00  | 5.29   | 3.79  | 9.37                     | 6.59   | 0.00   | 0.00   | 8.45   | 5.16   |
|          | Pos med     | 4.45                            | 1.73  | 2.09   | 0.00  | 5.49   | 2.41  | 9.37                     | 6.59   | 0.00   | 0.00   | 8.45   | 5.16   |
| Month 9  | positive*   | 87.5                            | 67.86 | 0.00   | 3.57  | 100.00 | 65.48 | NA                       | 100.00 | NA     | 0.00   | NA     | 100.00 |
|          | borderline* | 12.5                            | 8.33  | 0.00   | 3.57  | 0.00   | 14.29 | NA                       | 0.00   | NA     | 0.00   | NA     | 0.00   |
|          | negative*   | 0.00                            | 23.81 | 100.00 | 92.86 | 0.00   | 20.23 | NA                       | 0.00   | NA     | 100.00 | NA     | 0.00   |
|          | Pos avg     | 7.07                            | 3.70  | 0.00   | 1.91  | 5.45   | 3.21  | NA                       | 7.53   | NA     | 0.00   | NA     | 4.84   |
|          | Pos med     | 6.10                            | 2.98  | 0.00   | 2.10  | 4.03   | 2.86  | NA                       | 8.80   | NA     | 0.00   | NA     | 5.26   |
| Month 12 | positive*   | 87.5                            | 74.00 | 0.00   | 2.00  | 87.5   | 66.00 | 100.00                   | 100.00 | 0.00   | 0.00   | 100.00 | 100.00 |
|          | borderline* | 6.25                            | 12.00 | 6.25   | 0.00  | 6.25   | 8.00  | 0.00                     | 0.00   | 0.00   | 0.00   | 0.00   | 0.00   |
|          | negative*   | 6.25                            | 14.00 | 93.75  | 98.00 | 6.25   | 26.00 | 0.00                     | 0.00   | 100.00 | 100.00 | 0.00   | 0.00   |
|          | Pos avg     | 4.94                            | 4.13  | 0.00   | 2.73  | 5.38   | 3.15  | 10.62                    | 10.37  | 0.00   | 0.00   | 10.81  | 6.04   |
|          | Pos med     | 3.39                            | 3.37  | 0.00   | 2.73  | 3.71   | 2.38  | 10.62                    | 11.78  | 0.00   | 0.00   | 10.80  | 7.10   |

Notes: \* percentage of patients; Coh A – Cohort A (hospitalized patients); Coh B – Cohort B (non hospitalized patients); NA - not applicable; Pos avg – average of positive results; Pos med – median value of positive results

**Supplementary Table S3.** Summary of the virus neutralization test results at the individual time points in both cohorts. The numbers represents a proportion of samples in percents for with the indicated VNT levels.

| Virus neutralization titer | Cohort A (%) | Cohort B (%) |           |
|----------------------------|--------------|--------------|-----------|
| <40                        | 56.10        | NA           | Admission |
| 40                         | 11.70        | NA           |           |
| 80                         | 10.73        | NA           |           |
| 160-320                    | 12.68        | NA           |           |
| >640                       | 8.79         | NA           |           |
| <40                        | 2.44         | 23.08        | Week 2    |
| 40                         | 8.54         | 18.46        |           |
| 80                         | 4.88         | 43.08        |           |
| 160-320                    | 51.22        | 12.31        |           |
| >640                       | 32.92        | 3.07         |           |
| <40                        | 6.36         | 28.16        | Month 3   |
| 40                         | 12.73        | 34.48        |           |
| 80                         | 18.18        | 21.26        |           |
| 160-320                    | 39.09        | 14.37        |           |
| >640                       | 23.64        | 1.73         |           |
| <40                        | 3.77         | 0.00         | Month 6   |
| 40                         | 1.89         | 0.00         |           |
| 80                         | 5.66         | 66.67        |           |
| 160-320                    | 9.43         | 33.33        |           |
| >640                       | 79.25        | 0.00         |           |
| <40                        | 0.00         | 36.90        | Month 9   |
| 40                         | 30.00        | 32.14        |           |
| 80                         | 40.00        | 14.29        |           |
| 160-320                    | 30.00        | 15.48        |           |
| >640                       | 0.00         | 1.19         |           |
| <40                        | 0.00         | 27.27        | Month 12  |
| 40                         | 14.29        | 9.09         |           |
| 80                         | 7.14         | 12.73        |           |
| 160-320                    | 14.29        | 18.18        |           |
| >640                       | 64.29        | 32.73        |           |
